# Supplementary material for: Health-Related Coping and Social Interaction in People with Multiple Sclerosis Supported by a Social Network: Pilot Study With a New Methodological Approach
Source: PubMed Central journal article supplement (PMC5533941; doi:10.2196/ijmr.7402), 2017-07-14
Supplement: ijmr_v6i2e10_app1.pdf [file ijmr_v6i2e10_app1.pdf]

## Data entry

### Innovazione e Social media

Datestamp:

IP address:

### Le domande sul Sito smsocialnetwork

G1\_Q000  
1 **Da quanto tempo  
stai affrontando la  
Sclerosi Multipla?**  
Anni   
Mesi

G1\_Q000  
2 **Da quanto tempo  
sei in cura con  
trattamenti medici  
ed utilizzo di  
medicinali?**  
Anni   
Mesi

G1\_Q000  
3 **Quante volte  
accedi al  
smsocialnetwork?**

G1\_Q000  
4 **In quale misura  
accedi a  
smsocialnetwork  
rispetto a quante  
volte accedi a  
internet?**

G1\_Q000  
5 **Attualmente come  
giudichi il tuo stato  
di salute?**

### PRESENZA IN INTERNET

G2\_Q000  
1 **Indica in quale  
misura  
smsocialnetwork ti  
ha aiutato per:  
Scegli la risposta  
più appropriata  
per ogni  
affermazione  
1(nulla) e 7  
(moltissimo)**  
ricevere  
informazioni

imparare come  
fare delle cose

avere nuove  
idee

risolvere  
problemi

intraprendere  
decisioni

G2\_Q000  
2

**Indica in quale  
misura sei  
d'accordo o non sei  
d'accordo con le  
seguenti citazioni.**

uso  
frequentemente  
chat istantanea per  
parlare con gli altri  
membri di questa  
comunità

in genere conosco  
gli altri utenti  
connessi nel sito

Gli altri utenti  
rispondono  
velocemente ai  
miei post

Gli altri utenti  
rispondono  
velocemente ai  
miei messaggi  
privati

G2\_Q000  
3

**Quando discuti con  
i tuoi amici  
all'interno del  
social network su  
medicinali e  
trattamenti, tu:**

G2\_Q000  
4

**Indica in quale  
misura sei  
d'accordo con le  
seguenti**

racconto la mia  
storia agli altri  
membri della

**affermazioni.**

comunità

condivido foto o  
altre  
informazioni  
personali con gli  
altri membri di  
questa comunità

esprimo le mie  
opinioni nei miei  
post

mostro le mie  
reali  
informazioni  
personali nel  
mio profilo

uso uno  
pseudonimo in  
questa comunità  
che mi  
differenzia dagli  
altri membri

G2\_Q000  
5

**Indica il tuo livello  
di soddisfazione  
cliccando nella  
risposta a destra**

Tutto sommato,  
sono soddisfatto  
della mia  
esperienza in  
questa  
community

Generalmente, mi  
fa piacere  
interagire con  
altre persone in  
questa  
community

G2\_Q000  
6

**Con che frequenza  
i tuoi amici nella  
della community ti  
chiedono di  
trattamenti e  
medicinali?**

## PRESENZA IN INTERNET 2

G3\_Q000  
1

**Indica in quale  
misura sei  
d'accordo o non sei  
d'accordo con le  
seguenti  
dichiarazioni:**

in quale misura  
hai la sensazione  
di "essere molto  
vicino agli  
altri" ?

in quale misura  
hai la sensazione  
di essere insieme  
con gli altri ?

G3\_Q000  
2

**Indica quanto sei  
d'accordo  
cliccando nelle  
risposte a destra**

spesso aiuto gli  
altri membri di  
questa  
community che  
hanno bisogno di  
informazioni o  
aiuto

ho un ruolo  
attivo in questa  
community

ho dato consigli  
in questa  
community

i miei consigli  
sono stati  
applicati dagli  
altri membri di  
questa  
community in  
maniera positiva

G3\_Q000  
3

**Come descrivi le  
tue attività offline?  
Rispondi alle  
seguenti  
affermazioni**

contatto  
telefonticamente i  
membri di questa  
community

incontro  
informalmente i  
membri di questa  
community

partecipo  
attivamente ai  
regolari incontri  
organizzati al di  
fuori della  
community

partecipo alle  
attività organizzate  
dalla community  
online

G3\_Q000  
4 **nelle discussioni su  
medicinali e  
trattamenti, tu sei  
più propenso:**

G3\_Q000  
5 **nelle discussioni su  
medicinali e  
trattamenti cosa ti  
capita  
maggiormente?**

G3\_Q000  
6 **In genere, quando  
discuti con altri  
membri del tuo  
gruppo, tu sei:**

G3\_Q000  
7 **si prega di dare il  
nome di tre persone  
che ti permettono  
sempre di ottenere  
qualche consiglio**

1)

2)

3)

G3\_Q000  
8 **Indica il nome di  
persone che in  
passato ti hanno  
dato informazioni  
utili su medicinali e  
trattamenti:**

1)

2)

3)

4)

5)

### INNOVAZIONE PERSONALE

G4\_Q000  
1

**Indica in quale  
misura sei  
d'accordo o non sei  
d'accordo con le  
seguenti  
affermazioni**

mi piace  
esplorare altri  
siti web

quando so di  
un nuovo sito  
web trovo  
sempre una  
scusa per  
visitarlo

tra gli i utenti  
della  
community io  
sono di solito il  
primo a  
visitare nuovi  
siti

in generale non  
sono molto  
interessato nel  
visitare nuovi  
siti

quando ho  
tempo libero,  
di solito visito  
nuovi siti web

### INNOVAZIONE

G5\_Q000  
1

**In quale misura  
hai  
trovato problemi n  
ella community?**

G5\_Q000  
2

**In quale misura  
hai  
trovato soluzioni n  
ella nuova  
community?**

### EFFETTIVITA'

G6\_Q000  
1

**Quanto sono  
effettive le  
soluzioni proposte**

**in questo sito web  
per la tua  
situazione?**

G6\_Q000  
2

**Quanto efficaci  
sono le nuove idee  
proposte nel sito  
web per il tuo stato  
di salute?**

Please choose..

G6\_Q000  
3

**Quante sono le  
nuove pratiche  
suggerite dagli  
altri in merito agli  
effetti collaterali?**

Please choose..

### Adozione

G7\_Q000  
1

**Hai mai applicato  
il suggerimento  
trovato in un  
forum?**

Please choose..

G7\_Q000  
2

**Quanto hai seguito  
precisamente il  
consiglio  
suggerito?**

Please choose..

G7\_Q000  
3

**In quale misura il  
contenuto di un  
messaggio ti ha  
motivato ad  
intraprendere  
un'azione?**

Please choose..

G7\_Q000  
4

**In quale misura sei  
d'accordo con le  
azioni suggerite nel  
messaggio?**

Please choose..

### Demografia

Q40

**Quale è il tuo  
username nella  
community?  
(opzionale  
ma raccomandato)**

G8\_Q000  
1

**Quanti anni hai?**

Please choose..

G8\_Q000  
2

**sessu:**

Please choose..

G8\_Q000  
3

**qual è il tuo livello  
più alto di  
educazione?**

Please choose..
